# Supplementary material for: A phase 1b/2a clinical trial of dantrolene sodium in patients with Wolfram syndrome
Source: JCI journal article supplement (doi:10.1172/jci.insight.145188), 2021-06-29
Supplement: sd1 [file 1]

## **Supplementary Information**

**Supplementary Figure 1. Grip strength of each study subject during the study.** A) Right hand B) Left hand.

**Supplementary Figure 2. C-peptide data from each study subject over the course of the study.** Blue represents baseline (fasting) C-peptide. Orange represents 30-minute (stimulated) C-peptide. C-peptide is in ng/mL.

**Supplementary Figure 3. Additional markers of  $\beta$ -cell function.** A) Proinsulin collected during a mixed meal tolerance test. B) Insulinogenic Index. C) Area Under the Curve (AUC) C-peptide /AUC Glucose. D) C-peptide to Glucose Ratio All study subjects are broken down into adult and pediatric subgroups. Light boxes represent fasting results, while dark boxes represent 30-minute (stimulated) values. Responders are differentiated from non-responders by having a change in  $\Delta$  C-peptide ( $\Delta\Delta$  C-peptide)  $\geq 0.1$  ng/mL over the course of the study.

**Supplementary Figure 4. LogMAR visual acuity plot including subject 12.** Subject 12 was excluded from the analysis as they are blind with a LogMar = 3.

**Supplementary Figure 5. Linear regression analysis.** Linear regression analysis comparing  $\Delta\Delta$  C-peptide to (A) LogMAR visual acuity, (B) total WURS, and (C) physician rated WURS. R<sup>2</sup> and p-values are demonstrated in the top right corner of each panel.

A

Right hand

Subject ID

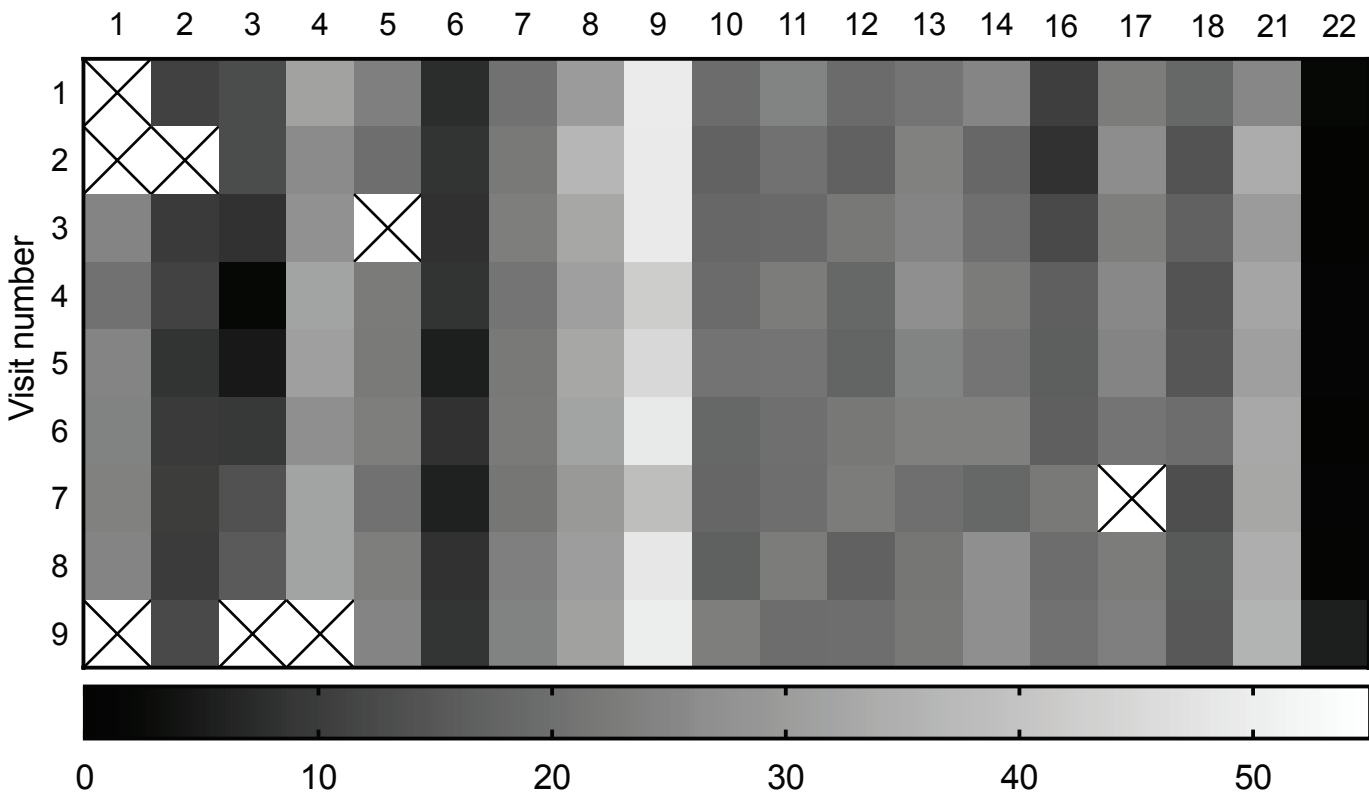

B

Left hand

Subject ID

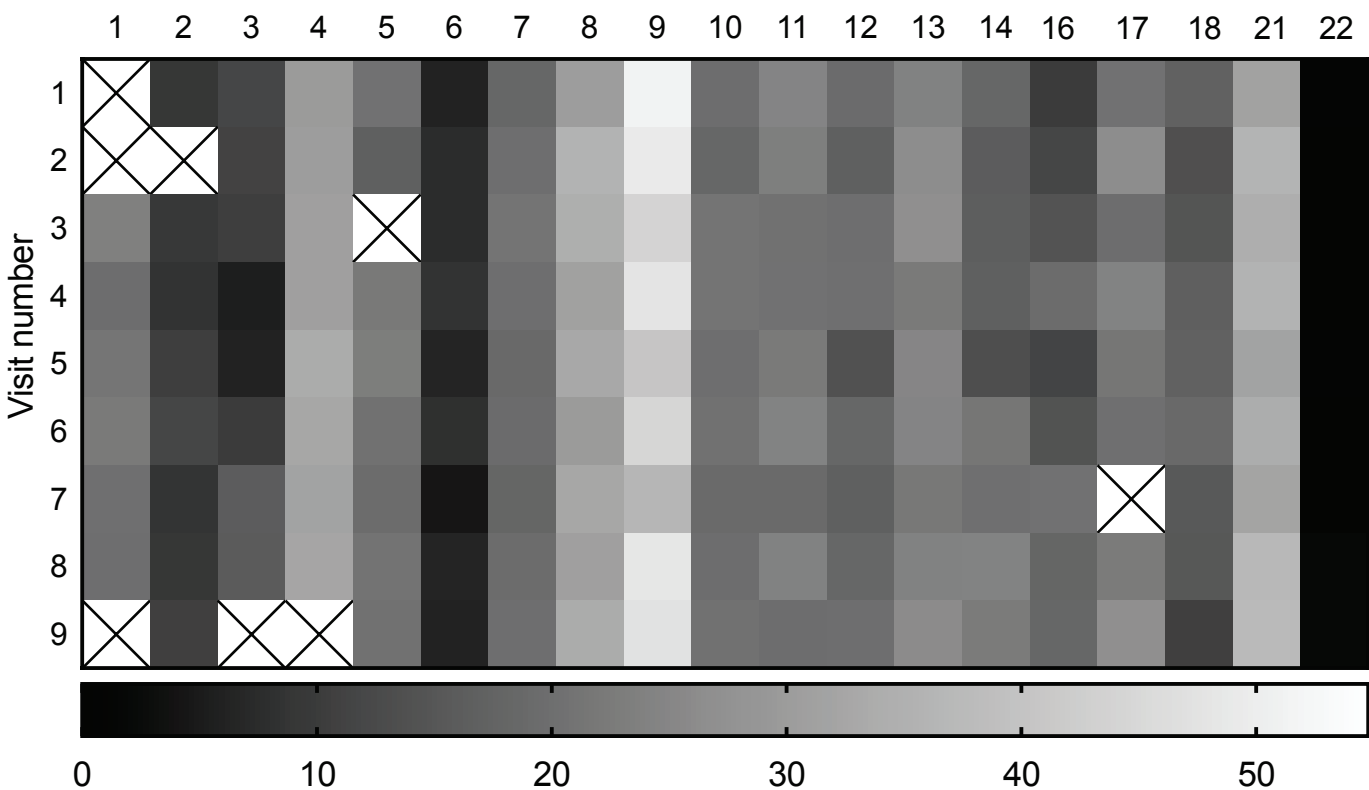

# Supplementary Figure 2

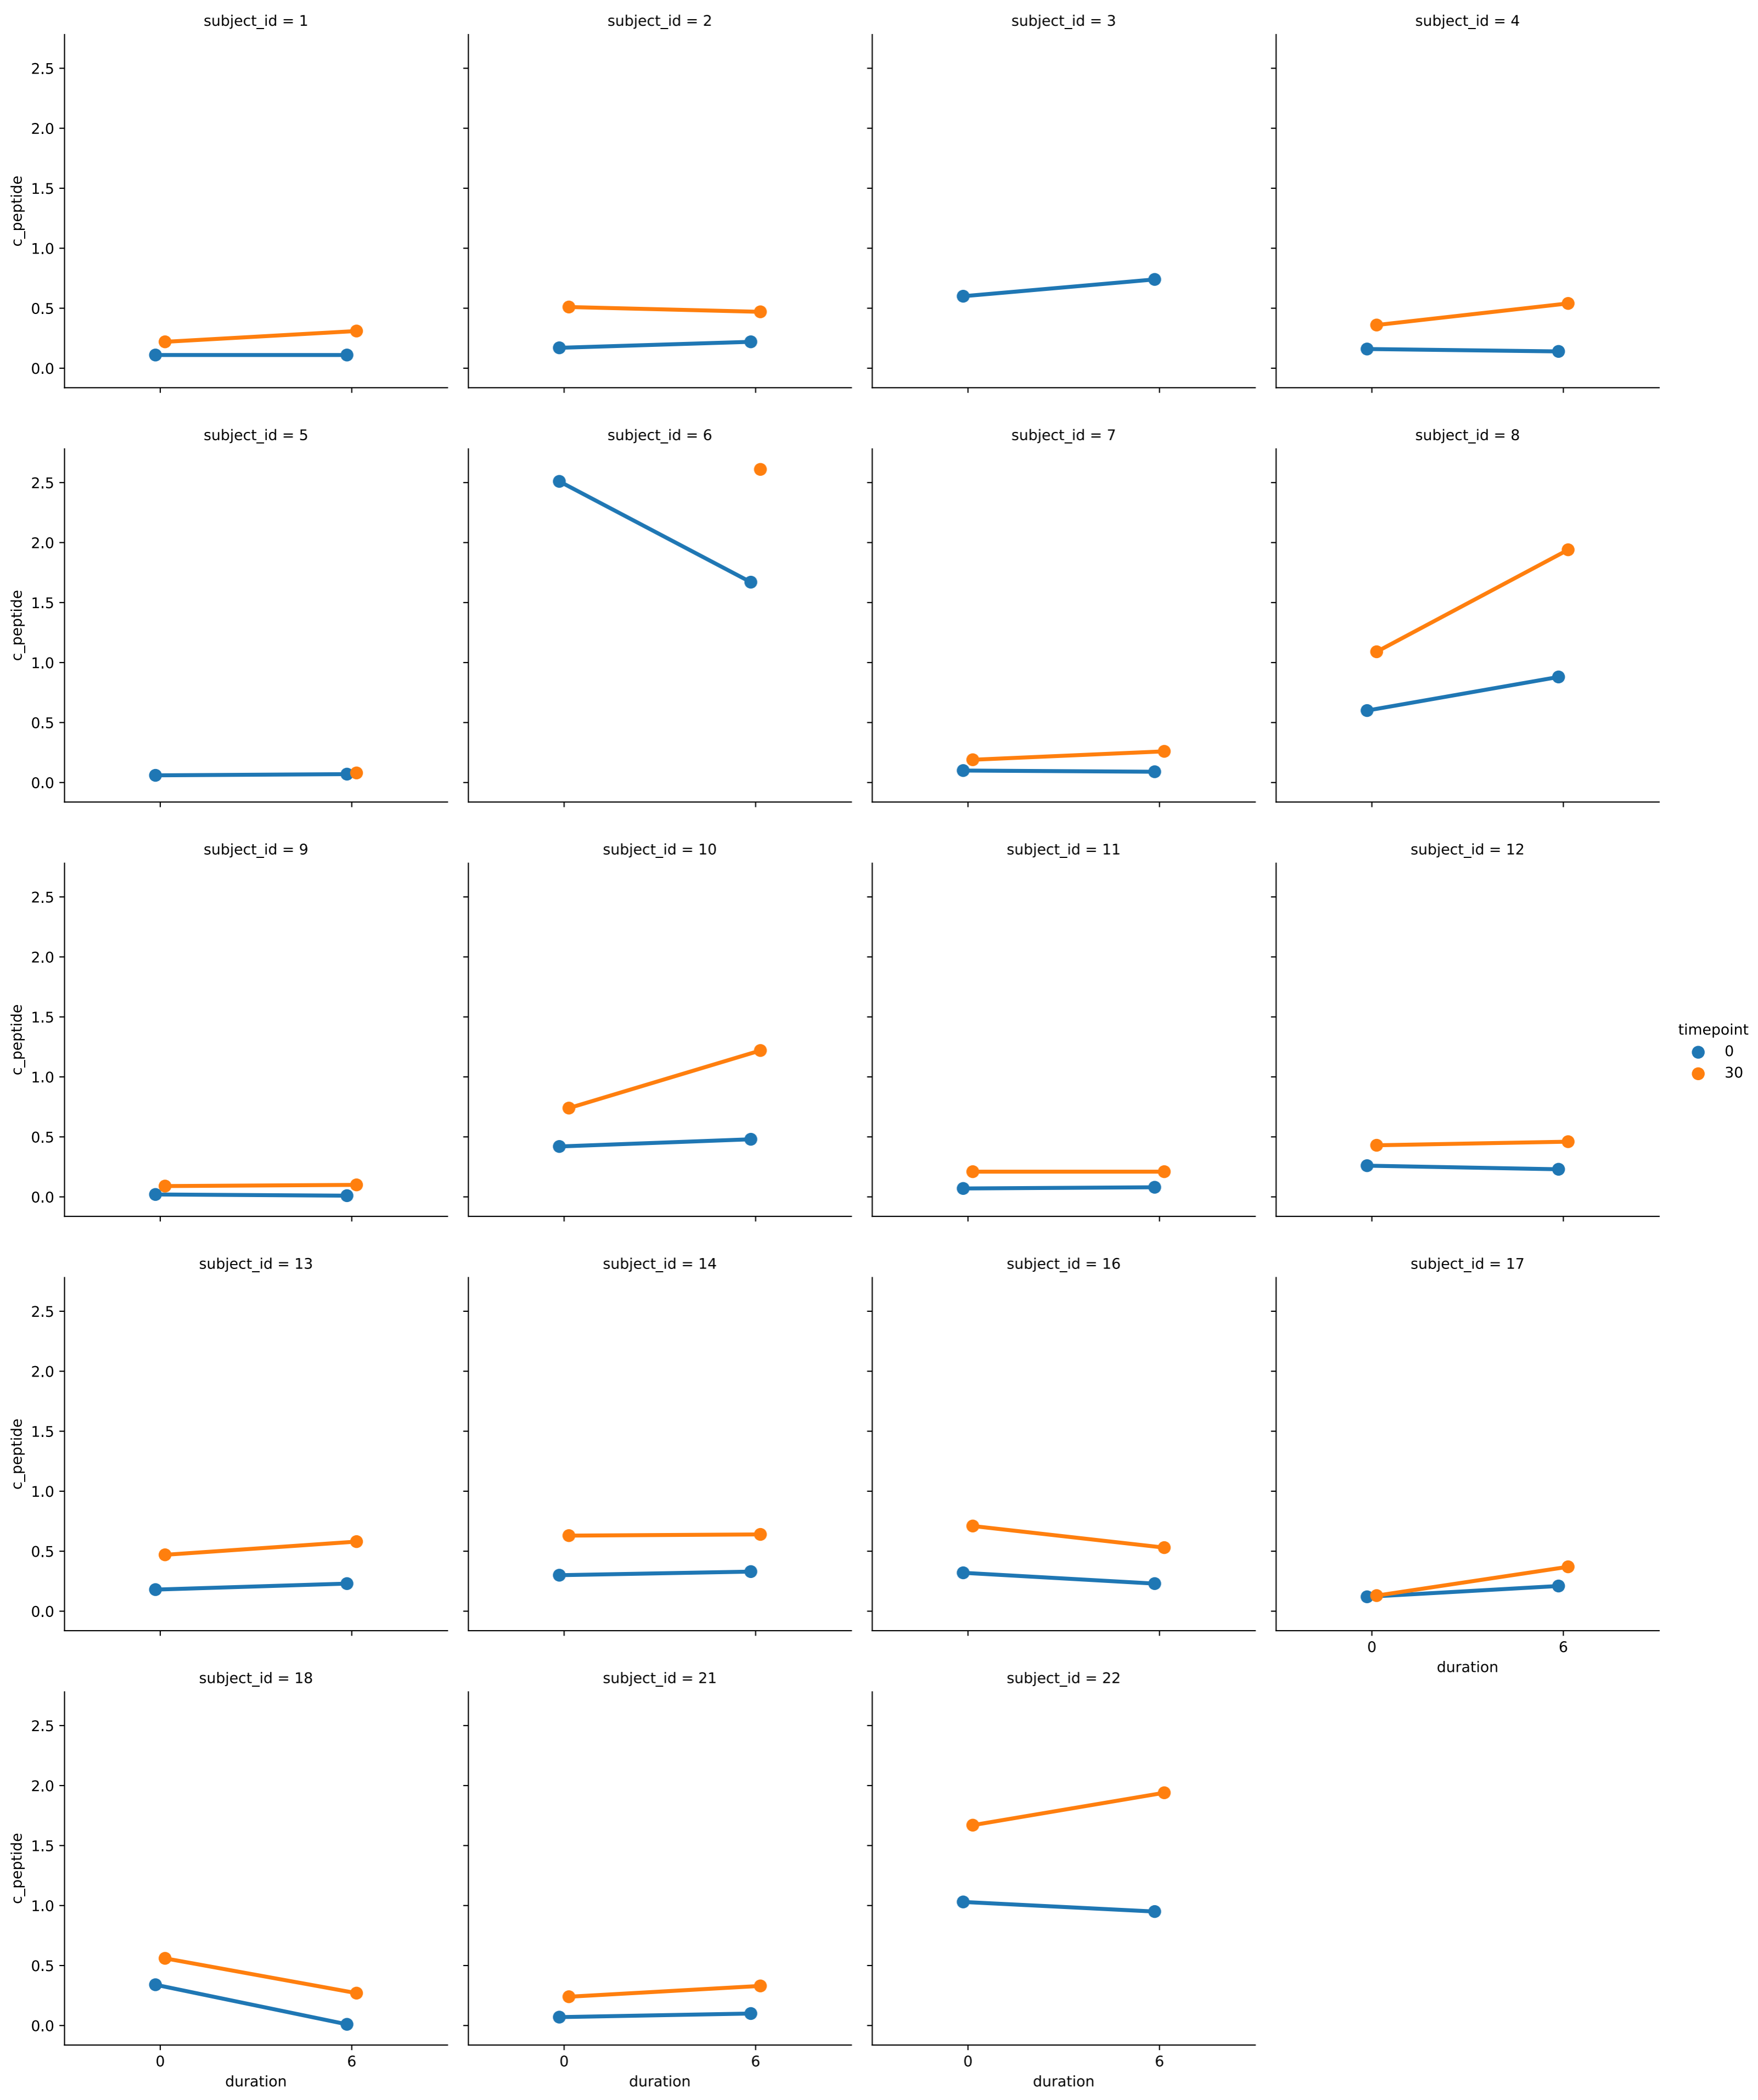

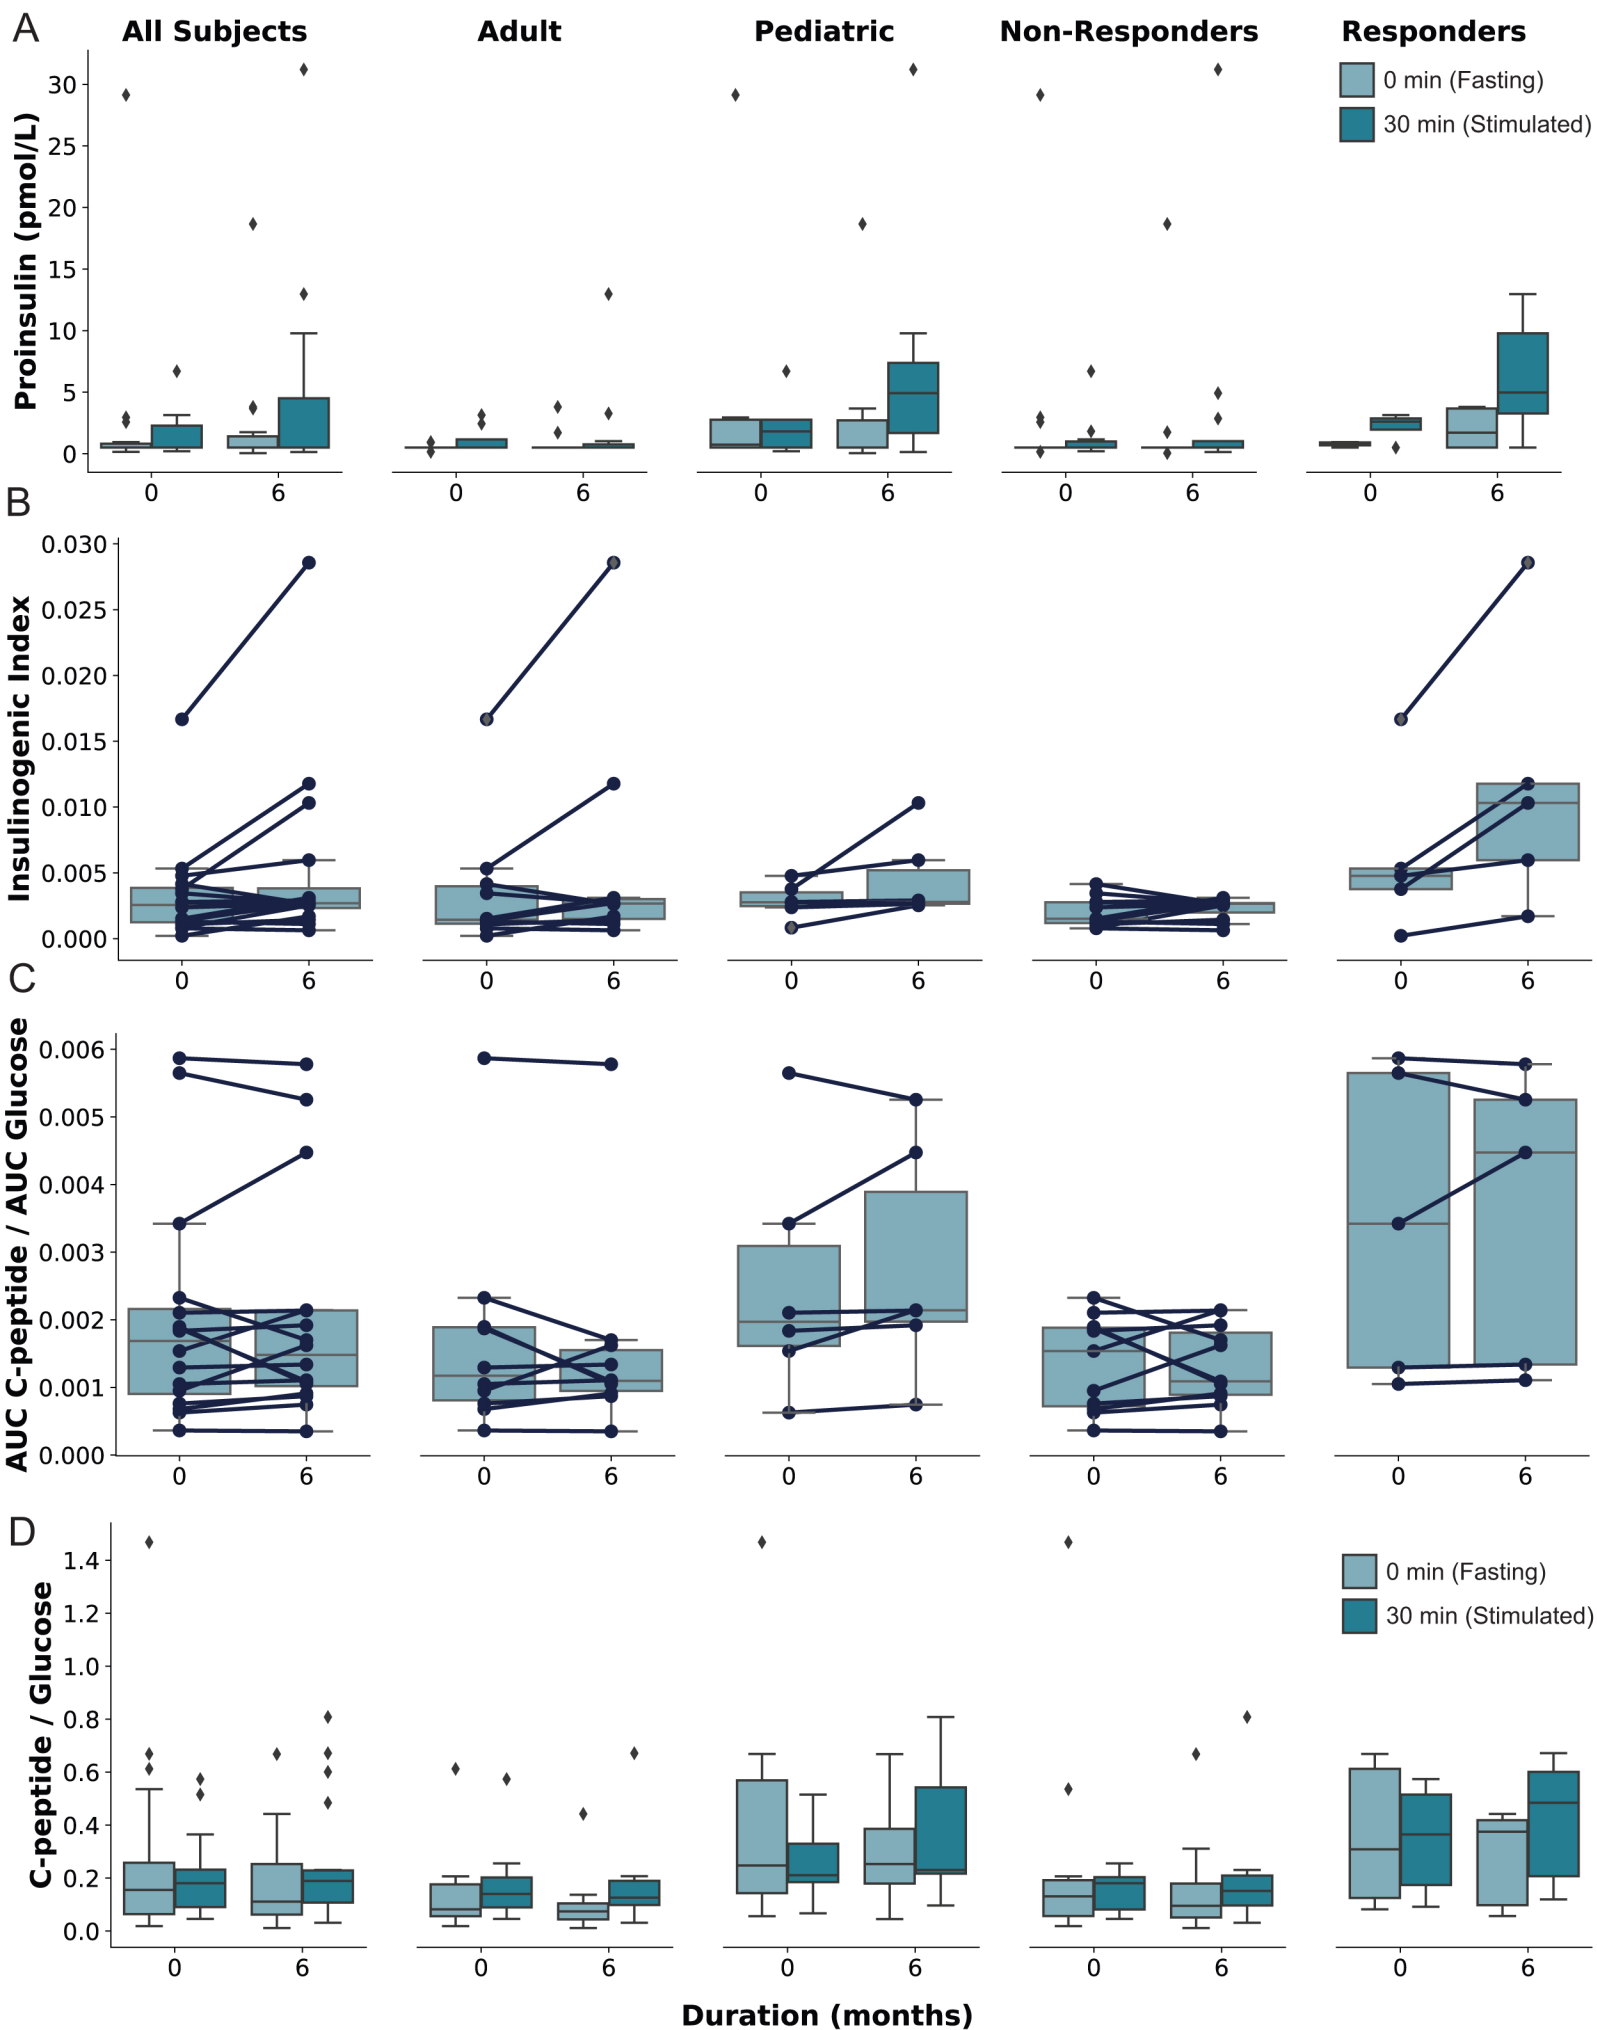

Supplementary Figure 4

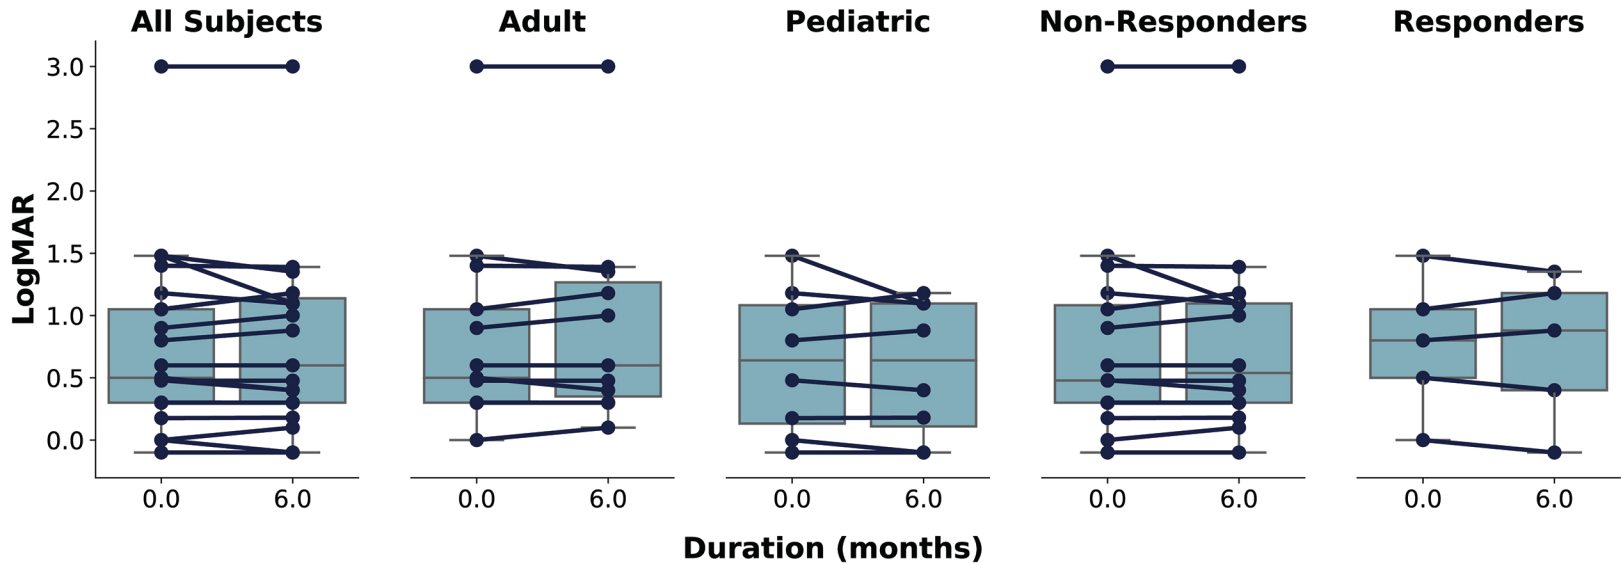

# Supplementary Figure 5

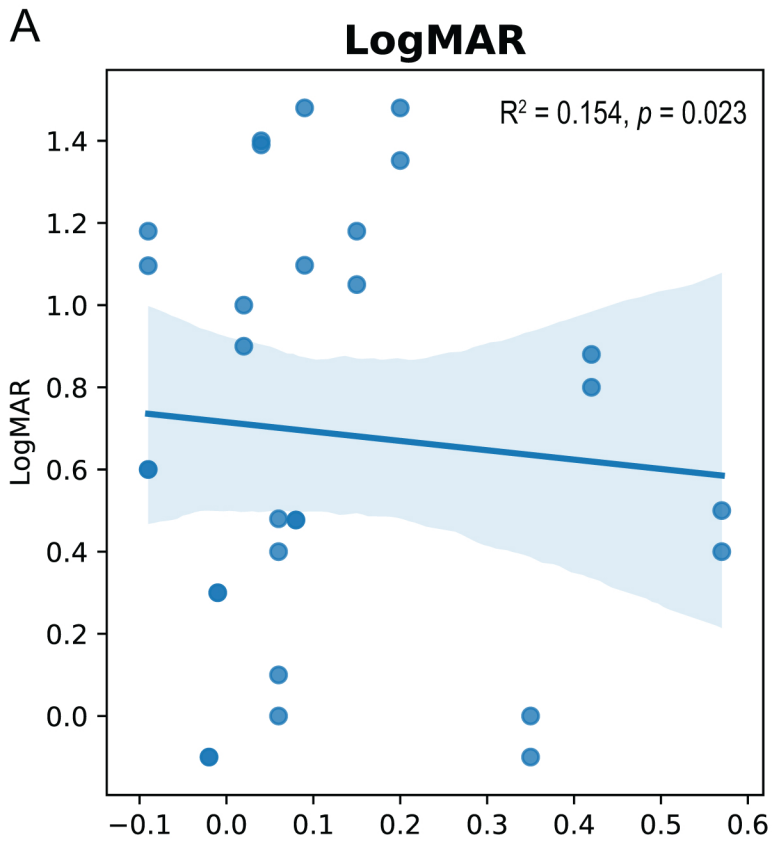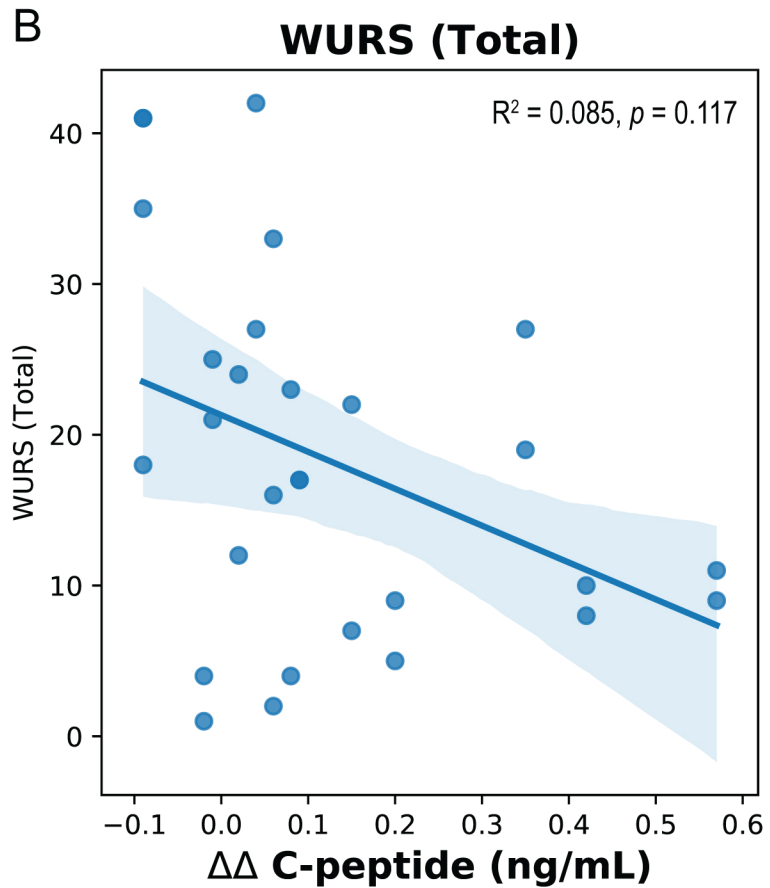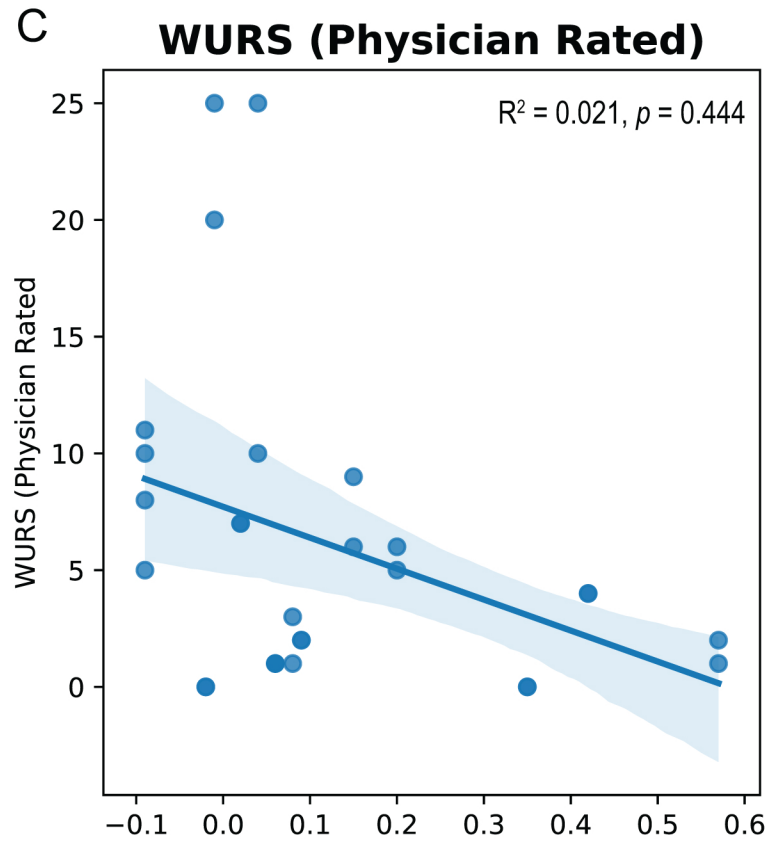

| Subject ID | WFS1             |                  | Age at Diagnosis  |               |                    |              | Duration (yrs)    |
|------------|------------------|------------------|-------------------|---------------|--------------------|--------------|-------------------|
|            | Allele 1         | Allele 2         | Diabetes Mellitus | Optic Atrophy | Diabetes Insipidus | Hearing Loss | Diabetes Mellitus |
| 1          | p.(R147Gfs*17)   | p.(W540*)        | 3                 | 7             | 12                 | 9            | 13                |
| 2          | p.(L200Rfs*87)   | p.(E752*)        | 5                 | 5             | 7                  | 7            | 7                 |
| 3          | p.(E169K)        | p.(E169K)        | 5                 | 6             | 6                  | 6            | 4                 |
| 4          | p.(V412Sfs*29)   | p.(V415del)      | 5                 | 6             | 6                  | 6            | 20                |
| 5          | p.(L200P)        | p.(R232P)        | 5                 | 15            | --                 | 16           | 18                |
| 6          | p.(L200P)        | p.(R232P)        | 7                 | --            | --                 | 3            | 1                 |
| 7          | p.(K253*)        | p.(F883Sfs*68)   | 7                 | 20            | 22                 | --           | 19                |
| 8          | p.(E202G)        | p.(D211N)        | 14                | 13            | --                 | --           | 6                 |
| 9          | p.(G107E)        | p.(R629W)        | 6                 | 17            | 17                 | 7            | 23                |
| 10         | p.(F883Sfs*68)   | --               | 6                 | 9             | 10                 | 16           | 11                |
| 11         | p.(H313Y)        | --               | 4                 | 13            | --                 | 2            | 16                |
| 12         | p.(E273*)        | p.(W613*)        | 6                 | 8             | 11                 | 9            | 12                |
| 13         | p.(E202G)        | p.(F350del)      | 7                 | 14            | --                 | --           | 8                 |
| 14         | p.(E202G)        | p.(F350del)      | 5                 | --            | --                 | --           | 7                 |
| 16         | p.(L282P)        | p.(W613*)        | 6                 | 18            | 17                 | 16           | 17                |
| 17         | p.(S790*)        | p.(L567_F568del) | 7                 | 12            | --                 | --           | 26                |
| 18         | p.(E169K)        | p.(V415del)      | 9                 | 15            | ?                  | 8            | 18                |
| 21         | p.(F413_V415del) | p.(F883Sfs*68)   | 5                 | 14            | 16                 | --           | 17                |
| 22         | p.(R42Efs*101)   | p.(F883Sfs*68)   | 4                 | --            | --                 | --           | 2                 |

**Supplementary Table S1. Genetic and Clinical Characteristics of the Study Subjects**

| Indication           | Medication Names                                                                                                                       |                                                                                                                                                                                      | No. (%) of Patients |              |
|----------------------|----------------------------------------------------------------------------------------------------------------------------------------|--------------------------------------------------------------------------------------------------------------------------------------------------------------------------------------|---------------------|--------------|
|                      | Pediatric                                                                                                                              | Adult                                                                                                                                                                                | Pediatric (n=8)     | Adult (n=11) |
| Diabetes             | Humalog, Insulin, Lantus, Levemir, Novolog                                                                                             | Calcium, Desmopressin, Humalog, Insulin, Iron, Lantus, Metformin, Novolog, Victoza                                                                                                   | 8 (100.0)           | 11 (100.0)   |
| Supplement           | CoQ10, Fiber-Con, Fiber Gummies, Fish Oil, Idebenone, Iron, Jucie Plus, Multivitamin, NAC, Nicotinamide, Omega 369, TUDCA, Vitamin B12 | Calcitriol, Cholecalciferol, CoQ10, Cranberry Extract, DHA 500, Iron, Minrex, Multivitamin, Navitol, Sodium Chloride, Vitamin B-Complex, Vitamin C, Vitamin D, Vitamin D3, Vitamin E | 6 (75.0)            | 9 (81.8)     |
| Behavior/Mood        | Ambilify, Citalopram, Risperidone, Vistal, Wellbutrin, Zoloft                                                                          | Ativan, Bupropion ER, Focalin, Guanfacine, Hydroxyzine Pamoate, Lamotrigine, Paxil, Setraline, Vyvanse                                                                               | 3 (37.5)            | 6 (54.5)     |
| Pain                 | Acetaminophen, Ketorolac, Magnesium Citrate, Prochlorperazine, Topiramate                                                              | Acetaminophen, Ibuprofen, Keppra, Lamotrigene, Mefenamic Acid                                                                                                                        | 1 (12.5)            | 5 (45.5)     |
| GI Problems          | Dicyclomin, Pepcid Complete, Pentasa, Zantac                                                                                           | Metocloperamide, Nexium, Nizatidine, Omeprazole, Probiotic                                                                                                                           | 2 (25.0)            | 4 (36.4)     |
| Antibiotic           | Amoxicillin, Azithromycin, Azo, Cefepime                                                                                               | Ciprofloxacin, Doxycycline Hyclate, Macrobid                                                                                                                                         | 3 (37.5)            | 2 (18.2)     |
| Constipation         | Miralax, Senna                                                                                                                         | Docusate, Linzess, Polyethylene Glycol                                                                                                                                               | 2 (25.0)            | 3 (27.3)     |
| Birth Control        | -                                                                                                                                      | Camrese, Glidess, JunetFe, Levonorgestrel, Ortho Tri-Cyclen, Tri-Estarylla, Trisprintec                                                                                              | -                   | 5 (45.5)     |
| Nocturnal Enuresis   | Desmopressin                                                                                                                           | Desmopressin                                                                                                                                                                         | 3 (37.5)            | 1 (9.1)      |
| Antiviral            | Tamiflu                                                                                                                                | Tamiflu, Oseltamivir, Valaciclovir                                                                                                                                                   | 1 (12.5)            | 2 (18.2)     |
| Allergies            | Allegra, Claritin                                                                                                                      | Zyrtec                                                                                                                                                                               | 2 (25.0)            | 1 (9.1)      |
| Bladder Problems     | Azo                                                                                                                                    | Vesicare                                                                                                                                                                             | 1 (12.5)            | 1 (9.1)      |
| Nausea/Vomiting      | Prochlorperazine                                                                                                                       | Ondansetron                                                                                                                                                                          | 1 (12.5)            | 1 (9.1)      |
| Diarrhea             | Immodium                                                                                                                               | Linzess                                                                                                                                                                              | 1 (12.5)            | 1 (9.1)      |
| Low Testosterone     | -                                                                                                                                      | Androgel                                                                                                                                                                             | -                   | 2 (18.2)     |
| Sleep Aid            | -                                                                                                                                      | Melatonin, Modafinil                                                                                                                                                                 | -                   | 2 (18.2)     |
| Tinea                | -                                                                                                                                      | Ketoconazole                                                                                                                                                                         | -                   | 1 (9.1)      |
| Hypothyroid          | -                                                                                                                                      | Levothyroxine                                                                                                                                                                        | -                   | 1 (9.1)      |
| Hypertension         | -                                                                                                                                      | Guanfacine, Lisinopril, Losarten                                                                                                                                                     | -                   | 1 (9.1)      |
| High Cholesterol     | -                                                                                                                                      | Rosuvastatin                                                                                                                                                                         | -                   | 1 (9.1)      |
| Appetite Stimulant   | -                                                                                                                                      | Cyproheptadine                                                                                                                                                                       | -                   | 1 (9.1)      |
| Nasal Drainage       | -                                                                                                                                      | Ipravent                                                                                                                                                                             | -                   | 1 (9.1)      |
| Cough Suppressant    | -                                                                                                                                      | Promethazine DM Syrup                                                                                                                                                                | -                   | 1 (9.1)      |
| Hyponatremia         | Sodium Chloride                                                                                                                        | -                                                                                                                                                                                    | 1 (12.5)            | -            |
| Hypoglycemia         | Glucagon                                                                                                                               | -                                                                                                                                                                                    | 1 (12.5)            | -            |
| Molluscum            | Cetirizine, Zyrtec                                                                                                                     | -                                                                                                                                                                                    | 1 (12.5)            | -            |
| Rash                 | Benadryl, Cetirizine, Diphenhydramine, Triamcinolone, Zyrtec                                                                           | -                                                                                                                                                                                    | 1 (12.5)            | -            |
| Anemia               | Iron                                                                                                                                   | -                                                                                                                                                                                    | 1 (12.5)            | -            |
| Trigeminal Neuralgia | Carbamazepine, Naproxen                                                                                                                | -                                                                                                                                                                                    | 1 (12.5)            | -            |

**Table S2. Concomitant Medications Used Throughout Trial**

| Duration (Months)              | 0     |        |        |            |       | 6       |        |        |            |       | 0       |                |       |            |       | 6       |                |       |            |       |
|--------------------------------|-------|--------|--------|------------|-------|---------|--------|--------|------------|-------|---------|----------------|-------|------------|-------|---------|----------------|-------|------------|-------|
|                                | Class | Adults | SEM    | Pediatrics | SEM   | p-value | Adults | SEM    | Pediatrics | SEM   | p-value | Non-Responders | SEM   | Responders | SEM   | p-value | Non-Responders | SEM   | Responders | SEM   |
| BMI (kg/m <sup>2</sup> )       | 27.1  | 2.3    | 20.3   | 1.5        | 0.05  | 27.0    | 2.7    | 20.3   | 1.6        | 0.07  | 25.4    | 2.0            | 21.5  | 2.3        | 0.32  | 25.2    | 2.4            | 21.3  | 2.4        | 0.37  |
| HbA1c (%)                      | 7.4   | 0.2    | 7.4    | 0.4        | 0.97  | 7.4     | 0.3    | 7.6    | 0.4        | 0.70  | 7.5     | 0.2            | 7.1   | 0.2        | 0.49  | 7.6     | 0.3            | 7.1   | 0.3        | 0.42  |
| Fasting Glucose (mg/dL)        | 140.4 | 13.6   | 154.0  | 11.1       | 0.50  | 161.5   | 23.4   | 171.5  | 21.2       | 0.78  | 149.9   | 11.1           | 135.8 | 18.5       | 0.51  | 148.0   | 20.1           | 203.2 | 20.4       | 0.12  |
| Stimulated Glucose (mg/dL)     | 223.6 | 12.9   | 276.2  | 20.0       | 0.04  | 255.9   | 18.4   | 277.0  | 18.3       | 0.46  | 257.0   | 10.8           | 213.2 | 30.0       | 0.11  | 253.4   | 17.8           | 286.8 | 13.6       | 0.26  |
| Δ Glucose (mg/dL)              | 83.20 | 11.29  | 122.17 | 13.46      | 0.05  | 94.40   | 10.86  | 105.50 | 8.81       | 0.49  | 107.09  | 7.01           | 77.40 | 26.61      | 0.16  | 105.36  | 6.74           | 83.60 | 18.41      | 0.19  |
| Fasting C-peptide (ng/dL)      | 0.21  | 0.06   | 0.37   | 0.14       | 0.23  | 0.20    | 0.08   | 0.39   | 0.12       | 0.20  | 0.18    | 0.03           | 0.47  | 0.17       | 0.03  | 0.15    | 0.03           | 0.53  | 0.17       | 0.01  |
| Stimulated C-peptide (ng/dL)   | 0.40  | 0.10   | 0.71   | 0.21       | 0.15  | 0.50    | 0.17   | 0.86   | 0.25       | 0.23  | 0.39    | 0.06           | 0.80  | 0.27       | 0.06  | 0.38    | 0.05           | 1.20  | 0.33       | 0.00  |
| Δ C-peptide (ng/dL)            | 0.2   | 0.0    | 0.3    | 0.1        | 0.10  | 0.3     | 0.1    | 0.5    | 0.1        | 0.28  | 0.2     | 0.0            | 0.3   | 0.1        | 0.19  | 0.2     | 0.0            | 0.7   | 0.2        | 0.00  |
| Fasting Proinsulin (pmol/L)    | 0.6   | 0.1    | 1.0    | 0.5        | 0.24  | 1.0     | 0.3    | 1.2    | 0.6        | 0.73  | 0.7     | 0.2            | 0.8   | 0.1        | 0.95  | 0.6     | 0.1            | 2.0   | 0.7        | 0.01  |
| Stimulated Proinsulin (pmol/L) | 1.1   | 0.3    | 2.4    | 1.2        | 0.19  | 2.1     | 1.2    | 3.9    | 1.5        | 0.38  | 1.3     | 0.6            | 2.2   | 0.6        | 0.40  | 1.1     | 0.4            | 6.3   | 2.2        | 0.01  |
| Δ Proinsulin (pmol/L)          | 0.5   | 0.3    | 1.4    | 0.7        | 0.20  | 1.1     | 0.9    | 2.7    | 1.1        | 0.29  | 0.5     | 0.4            | 1.4   | 0.5        | 0.22  | 0.6     | 0.4            | 4.3   | 1.6        | 0.01  |
| Insulinogenic Index            | 0.004 | 0.002  | 0.003  | 0.001      | 0.737 | 0.006   | 0.003  | 0.005  | 0.001      | 0.765 | 0.002   | 0.000          | 0.006 | 0.003      | 0.044 | 0.002   | 0.000          | 0.012 | 0.005      | 0.007 |
| AUC C-peptide / AUC Glucose    | 0.002 | 0.001  | 0.003  | 0.001      | 0.352 | 0.002   | 0.000  | 0.003  | 0.001      | 0.168 | 0.001   | 0.000          | 0.003 | 0.001      | 0.013 | 0.001   | 0.000          | 0.004 | 0.001      | 0.006 |
| Logmar Score                   | 0.63  | 0.14   | 0.63   | 0.21       | 1.00  | 0.14    | 0.71   | 0.58   | 0.19       | 0.60  | 0.59    | 0.13           | 0.77  | 0.25       | 0.51  | 0.62    | 0.13           | 0.74  | 0.27       | 0.65  |
| WURS                           | 20.50 | 2.82   | 21.25  | 6.38       | 0.91  | 18.59   | 4.51   | 18.38  | 5.71       | 0.98  | 23.13   | 3.68           | 13.80 | 2.82       | 0.18  | 20.96   | 4.34           | 11.60 | 3.94       | 0.24  |
| WURS (Physician Rated)         | 7.6   | 1.8    | 3.1    | 1.3        | 0.09  | 8.8     | 2.7    | 3.1    | 1.2        | 0.11  | 6.3     | 1.6            | 4.2   | 1.6        | 0.48  | 7.5     | 2.3            | 3.2   | 1.2        | 0.28  |

Supplementary Table S3. Table comparing subgroup analyses at each timepoint

|                      | <b>Duration of Dantrolene Treatment (months)</b> |                   |
|----------------------|--------------------------------------------------|-------------------|
|                      | <b>0</b>                                         | <b>6</b>          |
| <b>VFQ-25 Domain</b> | (n=19)                                           | (n=19)            |
| General health       | 60.5 (4.4)                                       | 56.6 (4.6)        |
| General vision       | 61.1 (6.4)                                       | 56.8 (5.4)        |
| Ocular pain          | 81.6 (4.4)                                       | 82.2 (4.2)        |
| Near activities      | 59.2 (4.7)                                       | 57.0 (4.9)        |
| Distance Activities  | 65.9 (4.3)                                       | 59.6 (4.5)        |
| Vision specific      |                                                  |                   |
| Social functioning   | 77.6 (5.0)                                       | 77.0 (5.1)        |
| Mental health        | 67.8 (3.9)                                       | 68.8 (4.1)        |
| Role difficulties    | 66.4 (5.8)                                       | 73.7 (4.9)        |
| Dependency           | 63.2 (4.8)                                       | 62.3 (4.7)        |
| Driving              | 45.5 (13.8)                                      | 52.8 (14.7)       |
| Color vision         | 68.1 (7.8)                                       | 59.2 (8.6)        |
| Peripheral vision    | 73.7 (6.8)                                       | 63.2 (7.7)        |
| <b>Composite</b>     | <b>68.8 (3.1)</b>                                | <b>70.4 (3.2)</b> |

**Supplementary Table S4. Vision-related quality of life by the NEIVFQ-25.**

|                           | <b>Duration of Dantrolene Treatment (months)</b> |                   |
|---------------------------|--------------------------------------------------|-------------------|
|                           | <b>0</b>                                         | <b>6</b>          |
| <b>Scale - Mean (SEM)</b> | (n=8)                                            | (n=8)             |
| Physical health           | 77.7 (6.8)                                       | 80.4 (4.9)        |
| Psychosocial health       | 65.6 (9.7)                                       | 63.3 (8.1)        |
| <b>Total score</b>        | <b>69.8 (8.6)</b>                                | <b>69.3 (6.6)</b> |

**Supplementary Table S5. Pediatric Quality of Life (PedsQL) questionnaire**

**SF-36v Score**

| <b>Duration (months)</b> | <b>0</b>    | <b>6</b>    | <b><i>p</i>-value</b> |
|--------------------------|-------------|-------------|-----------------------|
| Count                    | 11          | 12          |                       |
| Mean (SEM)               | 115.4 (2.5) | 108.8 (2.7) | 0.3                   |

**Supplementary Table S6. Physical and mental health metrics as assessed by the SF-36v.**

| Duration (months) | Cytokine            | Norml range   | 0                        |                          |         | 6                        |                          |         | 0                         |                           |         | 6                         |                          |         | 0                        |                          |         | 6 |  |  |
|-------------------|---------------------|---------------|--------------------------|--------------------------|---------|--------------------------|--------------------------|---------|---------------------------|---------------------------|---------|---------------------------|--------------------------|---------|--------------------------|--------------------------|---------|---|--|--|
|                   |                     |               | Median (IQR)             | Median (IQR)             | p-value | Median (IQR)             | Median (IQR)             | p-value | Median (IQR)              | Median (IQR)              | p-value | Median (IQR)              | Median (IQR)             | p-value | Median (IQR)             | Median (IQR)             | p-value |   |  |  |
|                   | Fractalkine (pg/mL) | 330 ± 77.6    | 164.91 (147.00 - 209.69) | 162.03 (134.90 - 212.95) | 0.136   | 180.48 (146.33 - 178.50) | 153.92 (133.70 - 166.06) | 0.091   | 229.47 (175.91 - 267.22)  | 207.965 (172.94 - 234.26) | 0.753   | 164.225 (146.67 - 209.09) | 160 (134.30 - 198.24)    | 0.239   | 169.5 (160.48 - 250.05)  | 170.09 (141.45 - 222.60) | 0.345   |   |  |  |
|                   | GM-CSF (pg/mL)      | 16.8 ± 5.1    | 12.68 (7.79 - 30.11)     | 11.81 (6.82 - 26.48)     | 0.124   | 12.25 (6.59 - 15.20)     | 11.32 (6.04 - 12.14)     | 0.004   | 33.64 (23.17 - 45.43)     | 28.53 (25.42 - 39.24)     | 0.917   | 15.2 (6.31 - 24.94)       | 12.135 (5.35 - 25.42)    | 0.099   | 12.59 (12.25 - 30.11)    | 11.78 (11.32 - 30.38)    | 0.686   |   |  |  |
|                   | IFN-γ (pg/mL)       | 10.9 ± 3.5    | 48.44 (38.94 - 61.60)    | 45.61 (39.97 - 53.94)    | 0.124   | 48 (37.25 - 51.69)       | 40.58 (34.93 - 46.97)    | 0.021   | 88.915 (47.29 - 83.28)    | 91.35 (49.42 - 71.10)     | 0.917   | 49.495 (38.34 - 58.06)    | 40.8 (36.09 - 52.21)     | 0.136   | 51.69 (48.00 - 61.60)    | 47.24 (46.70 - 53.94)    | 0.550   |   |  |  |
|                   | Isoprostane (pg/mL) | 0.035 ± 0.006 | 0.151 (0.16 - 0.23)      | 0.189 (0.14 - 0.28)      | 0.118   | 0.158 (0.18 - 0.31)      | 0.189 (0.15 - 0.31)      | 0.043   | 0.167 (0.14 - 0.19)       | 0.1915 (0.14 - 0.26)      | 0.917   | 0.185 (0.15 - 0.21)       | 0.153 (0.13 - 0.26)      | 0.221   | 0.213 (0.19 - 0.27)      | 0.2055 (0.20 - 0.29)     | 0.273   |   |  |  |
|                   | ITAC (pg/mL)        | 30.8 ± 8.5    | 29.82 (23.30 - 38.20)    | 33.79 (28.23 - 46.26)    | 0.296   | 24.49 (21.32 - 32.14)    | 33.5 (20.19 - 43.05)     | 0.155   | 40.145 (31.92 - 58.93)    | 38.82 (31.36 - 51.36)     | 0.917   | 32.135 (27.59 - 39.17)    | 36.815 (30.12 - 47.17)   | 0.480   | 22.1 (20.53 - 23.99)     | 30.55 (18.24 - 35.94)    | 0.345   |   |  |  |
|                   | MIP-1α (pg/mL)      | 29.4 ± 3.9    | 8.9 (0.73 - 14.90)       | 9.03 (0.06 - 13.14)      | 0.975   | 9.2 (3.57 - 14.77)       | 10.7 (2.34 - 13.21)      | 0.859   | 5.755 (0.71 - 13.40)      | 3.86 (0.08 - 8.68)        | 0.893   | 8.745 (0.57 - 15.34)      | 8.395 (0.08 - 11.34)     | 0.799   | 8.9 (8.40 - 12.88)       | 12.14 (0.06 - 13.14)     | 0.716   |   |  |  |
|                   | MIP-1β (pg/mL)      | 8.4 ± 3.3     | 14.13 (9.56 - 17.90)     | 20.75 (17.02 - 27.89)    | 0.017   | 14.84 (10.39 - 18.21)    | 23.61 (20.35 - 28.41)    | 0.013   | 10.74 (6.37 - 14.79)      | 10.955 (5.73 - 16.05)     | 0.753   | 11.72 (9.43 - 15.53)      | 20.35 (15.68 - 28.11)    | 0.034   | 18.72 (15.57 - 19.25)    | 21.85 (17.51 - 23.87)    | 0.345   |   |  |  |
|                   | MIP-3α (pg/mL)      | 15.2 ± 9.1    | 19.88 (16.73 - 25.33)    | 19.96 (16.23 - 24.01)    | 0.076   | 19.26 (16.89 - 21.09)    | 17.7 (15.80 - 19.89)     | 0.091   | 24.315 (21.55 - 30.88)    | 23.075 (21.17 - 25.14)    | 0.463   | 20.495 (18.91 - 25.40)    | 19.38 (16.86 - 22.89)    | 0.136   | 19.26 (18.73 - 22.89)    | 17.7 (16.21 - 28.01)     | 0.225   |   |  |  |
|                   | TNFr (pg/mL)        | 5.9 ± 2.3     | 8.3 (5.55 - 7.89)        | 6.81 (5.92 - 7.89)       | 0.463   | 5.67 (5.13 - 9.90)       | 6.81 (6.01 - 8.81)       | 0.374   | 7.025 (6.44 - 7.52)       | 6.275 (5.54 - 7.52)       | 0.917   | 7.255 (6.03 - 9.74)       | 7.62 (6.06 - 10.43)      | 0.837   | 4.8 (4.72 - 5.00)        | 5.33 (5.15 - 6.81)       | 0.158   |   |  |  |
|                   | IL-1 (pg/mL)        | 1.1 ± 0.4     | 1.59 (1.12 - 2.06)       | 1.34 (1.12 - 1.73)       | 0.019   | 1.55 (1.01 - 2.02)       | 1.34 (0.88 - 1.87)       | 0.010   | 1.71 (1.27 - 3.33)        | 1.43 (1.15 - 2.58)        | 0.463   | 1.445 (1.11 - 2.04)       | 1.36 (1.07 - 1.88)       | 0.117   | 1.72 (1.55 - 2.06)       | 1.2 (1.13 - 1.99)        | 0.043   |   |  |  |
|                   | IL-2 (pg/mL)        | 4.7 ± 2.0     | 2.92 (2.14 - 3.68)       | 2.81 (1.76 - 3.25)       | 0.038   | 2.63 (1.67 - 3.55)       | 2.17 (1.58 - 2.86)       | 0.013   | 3.405 (2.79 - 4.97)       | 3.03 (2.53 - 4.83)        | 0.917   | 2.655 (2.06 - 3.69)       | 2.49 (1.74 - 2.96)       | 0.099   | 3.54 (2.92 - 3.69)       | 2.85 (2.43 - 3.32)       | 0.225   |   |  |  |
|                   | IL-4 (pg/mL)        | 61.7 ± 16.2   | 38.83 (20.75 - 331.40)   | 29.82 (14.10 - 190.49)   | 0.163   | 61.11 (19.24 - 313.87)   | 42.66 (13.70 - 270.50)   | 0.594   | 32.715 (28.95 - 257.51)   | 26.455 (22.34 - 33.66)    | 0.116   | 32.715 (28.16 - 120.62)   | 26.41 (20.09 - 96.52)    | 0.388   | 33.14 (20.75 - 1038.08)  | 29.82 (13.76 - 1068.54)  | 0.225   |   |  |  |
|                   | IL-6 (pg/mL)        | 5.2 ± 1.6     | 3.77 (2.33 - 7.61)       | 3.1 (1.82 - 5.32)        | 0.163   | 2.63 (1.67 - 8.93)       | 2.39 (1.36 - 7.77)       | 0.534   | 4.465 (3.80 - 6.90)       | 4.09 (3.33 - 4.41)        | 0.173   | 3.59 (2.55 - 5.50)        | 3.07 (2.20 - 4.71)       | 0.530   | 7.61 (2.13 - 16.08)      | 4.63 (0.93 - 17.02)      | 0.158   |   |  |  |
|                   | IL-6 (pg/mL)        | 7.9 ± 2.6     | 3.67 (2.35 - 28.36)      | 3.01 (1.89 - 19.67)      | 0.296   | 8.72 (2.50 - 28.53)      | 10.18 (2.44 - 28.44)     | 0.859   | 2.565 (2.16 - 22.01)      | 1.865 (1.38 - 2.37)       | 0.116   | 3.4 (2.31 - 18.66)        | 3.15 (1.87 - 13.46)      | 0.530   | 28.38 (2.66 - 107.27)    | 1.97 (1.81 - 113.14)     | 0.225   |   |  |  |
|                   | IL-7 (pg/mL)        | 18.0 ± 5.5    | 17.86 (15.17 - 21.61)    | 17.42 (15.98 - 20.41)    | 0.723   | 16.68 (14.08 - 19.21)    | 17.39 (15.83 - 18.51)    | 0.929   | 20.495 (19.31 - 27.59)    | 20.08 (16.81 - 23.79)     | 0.463   | 16.995 (14.96 - 21.67)    | 17.48 (15.91 - 19.92)    | 0.875   | 19.29 (17.86 - 20.56)    | 17.39 (16.98 - 20.41)    | 0.345   |   |  |  |
|                   | IL-8 (pg/mL)        | 10.4 ± 5.6    | 8.82 (5.52 - 56.49)      | 8.91 (7.13 - 52.88)      | 0.435   | 11.24 (6.13 - 60.59)     | 12.16 (7.46 - 56.59)     | 0.929   | 6.71 (4.94 - 28.44)       | 7.03 (5.38 - 8.54)        | 0.945   | 8.36 (5.89 - 28.67)       | 9.55 (7.18 - 23.78)      | 0.837   | 35.28 (5.49 - 221.21)    | 7.44 (7.13 - 200.53)     | 0.225   |   |  |  |
|                   | IL-10 (pg/mL)       | 20.4 ± 10.8   | 13.54 (9.71 - 24.43)     | 12.45 (8.20 - 21.53)     | 0.177   | 18.04 (12.05 - 28.43)    | 12.53 (8.45 - 21.80)     | 0.075   | 10.13 (7.38 - 15.72)      | 9.145 (7.40 - 15.53)      | 0.917   | 15.435 (9.21 - 25.43)     | 14.91 (8.58 - 21.67)     | 0.347   | 13.54 (11.27 - 17.45)    | 8.28 (8.15 - 12.53)      | 0.345   |   |  |  |
|                   | IL-12P70 (pg/mL)    | 4.1 ± 1.8     | 3.95 (3.23 - 4.33)       | 3.83 (3.06 - 4.29)       | 0.435   | 3.97 (2.73 - 4.23)       | 3.19 (2.70 - 4.04)       | 0.246   | 4.18 (4.01 - 4.49)        | 4.159 (3.91 - 4.32)       | 0.753   | 3.825 (3.25 - 4.40)       | 3.52 (2.99 - 4.40)       | 0.530   | 4.17 (3.23 - 4.19)       | 3.83 (3.65 - 4.21)       | 0.886   |   |  |  |
|                   | IL-13 (pg/mL)       | 10.1 ± 5.3    | 8.3 (6.70 - 30.21)       | 7.44 (4.90 - 17.33)      | 0.019   | 8.69 (6.37 - 32.57)      | 7.57 (4.98 - 27.09)      | 0.050   | 7.62 (6.90 - 24.79)       | 6.22 (4.52 - 7.59)        | 0.116   | 8.225 (6.81 - 15.13)      | 7.45 (6.11 - 10.33)      | 0.117   | 30.21 (6.03 - 70.99)     | 4.3 (3.46 - 59.29)       | 0.043   |   |  |  |
|                   | IL-17c (pg/mL)      | 12.1 ± 3.3    | 10.16 (7.08 - 12.53)     | 8.2 (5.83 - 9.39)        | 0.076   | 8.9 (5.40 - 10.27)       | 8.2 (5.10 - 8.87)        | 0.021   | 11.589 (8.73 - 12.41)     | 8.695 (6.98 - 11.71)      | 0.753   | 9.54 (6.61 - 11.21)       | 8.11 (5.48 - 9.18)       | 0.084   | 10.16 (8.05 - 12.44)     | 9.07 (6.21 - 9.36)       | 0.500   |   |  |  |
|                   | IL-21 (pg/mL)       | 4.9 ± 2.9     | 5.4 (3.67 - 7.35)        | 4.76 (2.67 - 6.99)       | 0.038   | 5.82 (2.85 - 6.68)       | 4.67 (2.50 - 5.57)       | 0.008   | 4.855 (4.18 - 8.37)       | 4.205 (3.22 - 6.11)       | 0.753   | 5.065 (3.42 - 7.85)       | 4.615 (2.58 - 6.21)      | 0.050   | 5.4 (4.04 - 6.00)        | 3.08 (3.08 - 5.06)       | 0.500   |   |  |  |
|                   | IL-23 (pg/mL)       | 399 ± 290     | 301.49 (188.62 - 548.89) | 195.95 (139.38 - 432.42) | 0.084   | 301.49 (125.60 - 525.79) | 195.95 (115.20 - 371.68) | 0.131   | 408.225 (247.06 - 596.50) | 276.86 (144.92 - 557.31)  | 0.345   | 270.86 (160.13 - 699.13)  | 198.54 (147.87 - 469.44) | 0.308   | 512.19 (267.56 - 539.36) | 195.95 (134.18 - 432.42) | 0.043   |   |  |  |

687  
688  
689

Supplemental Table 7. Levels of inflammatory cytokines and isoprostane
